# Supplementary material for: Similarities between COVID-19 and anti-MDA5 syndrome: what can we learn for better care?
Source: PubMed Central journal article supplement — Eur Respir J. 2020 Sep 24;56(3):2001618. doi: 10.1183/13993003.01618-2020 (PMC7338399; doi:10.1183/13993003.01618-2020), 2020-09-24
Supplement: ERJ-01618-2020.Shareable.pdf [file ERJ-01618-2020.Shareable.pdf]

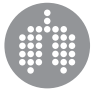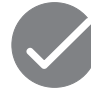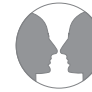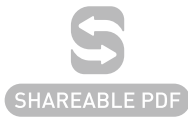

# Similarities between COVID-19 and anti-MDA5 syndrome: what can we learn for better care?

Margherita Giannini<sup>1</sup>, Mickael Ohana<sup>2</sup>, Benoit Nespola<sup>3</sup>,  
Giovanni Zanframundo<sup>4,5</sup>, Bernard Geny<sup>1,6</sup> and Alain Meyer<sup>1,6,7</sup>

**Affiliations:** <sup>1</sup>Physiology and Functional Explorations Dept, University Hospitals of Strasbourg, Strasbourg, France. <sup>2</sup>Radiology Dept, Nouvel Hôpital Civil, University Hospitals of Strasbourg, Strasbourg, France. <sup>3</sup>Laboratory of Immunology, Nouvel Hôpital Civil, University Hospitals of Strasbourg, Strasbourg, France. <sup>4</sup>Rheumatology, Fondazione IRCCS Policlinico San Matteo, Pavia, Italy. <sup>5</sup>Dept of Internal Medicine and Medical Therapeutics, University of Pavia, Pavia, Italy. <sup>6</sup>Federation of Translational Medicine of Strasbourg, Strasbourg University, Strasbourg, France. <sup>7</sup>Rheumatology Dept, National Centre for Rare Systemic Autoimmune Diseases, University Hospitals of Strasbourg, Strasbourg, France.

**Correspondence:** Alain Meyer, Rheumatology Dept, National Centre for Rare Systemic Autoimmune Diseases, University Hospitals of Strasbourg, 1 avenue Molière, Strasbourg 67098, France. E-mail: alain.meyer1@chru-strasbourg.fr

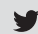

@ERSpublications

**Similarities between COVID-19 and anti-MDA5 syndrome support further evaluation of employing an immunomodulatory strategy in COVID-19** <https://bit.ly/3dN6lJ8>

**Cite this article as:** Giannini M, Ohana M, Nespola B, *et al.* Similarities between COVID-19 and anti-MDA5 syndrome: what can we learn for better care?. *Eur Respir J* 2020; 56: 2001618 [<https://doi.org/10.1183/13993003.01618-2020>].

This single-page version can be shared freely online.

*To the Editor:*

The coronavirus disease 2019 (COVID-19) pandemic has struck worldwide, leading to more than 7 million cases by June 2020, with a ~5.5% mortality rate, mainly due to acute respiratory distress syndrome (ARDS) [1].
